# Supplementary material
Source: PubMed Central journal article supplement (PMC7210721)
Supplement: mmc1.pdf [file mmc1.pdf]

YMTHE, Volume 28

## **Supplemental Information**

### **CRISPR/Cas9-Mediated miR-29b Editing as a Treatment of Different Types of Muscle Atrophy in Mice**

**Jin Li, Lijun Wang, Xuejiao Hua, Haifei Tang, Rui Chen, Tingting Yang, Saumya Das, and Junjie Xiao**

**Supplemental Figures and Legends:**

**Figure S1**

**a**

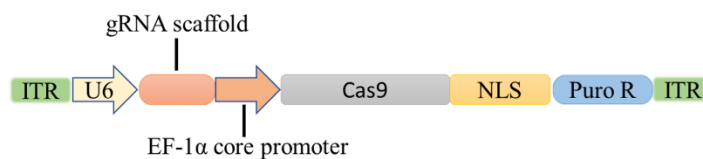

**b**

|    | Forward primer(5'-3')  | Reverse primer(5'-3')    | Locus           |
|----|------------------------|--------------------------|-----------------|
| 1  | GGGACTCGAGCACTCTATGTT  | AGGGTCATTAGCAGGGTTCC     | chr1:+196863288 |
| 2  | TCATCGGACCTTGACAGCTC   | TGTGCCAGGCCAGAGAAAA      | chr9:-101867160 |
| 3  | AGCCGAGCTATCAATGGGC    | TTCATCTGCATTCTGCGCTGT    | chr2:-44912669  |
| 4  | CTGCATTGAGTGCCTTAGCG   | GACCATTGGAAACCGTGTGA     | chr11:-26661876 |
| 5  | GCACTGGGGACATAGGTGAG   | AGCCACCTTGGCAATAGAC      | chr5:-68275574  |
| 6  | CAGTGAGCTTCACAGTTTGTCT | GAGTCATACAGTATTTAGGCTGCT | chrX:+93743993  |
| 7  | AAGGCTGAATGCCGTTCACT   | GGCAAGAAGAACCTGGGACA     | chr16:+15872481 |
| 8  | ATGCAGCAGATGCCAGACTT   | CTCATGAGCACAGGAGCCAA     | chr15:-66654630 |
| 9  | GACCACCACAATCGGCTGTA   | GTTCTTGGCTCCCCTGACTC     | chr11:-98951837 |
| 10 | TGGCTGCCAATACCTATGCT   | AGCCATCCCCTCGACTCAAA     | chr4:+40629962  |

**c**

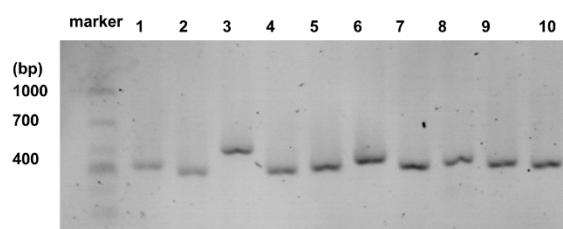

**Figure S1. Backbone of lentiCRISPRv2 and T7E1 analysis for the top genome-wide off-target sites with genomic DNA from C2C12 myotubes. (a)** The backbone of lentiCRISPRv2 (Addgene plasmid # 52961). **(b)** The predicted top 10 potential off-target sites in the mouse genomic (<http://crispr.mit.edu/>). **(c)** No significant off-target mutagenesis was detected in T7E1 cleavage assay.

**Figure S2**

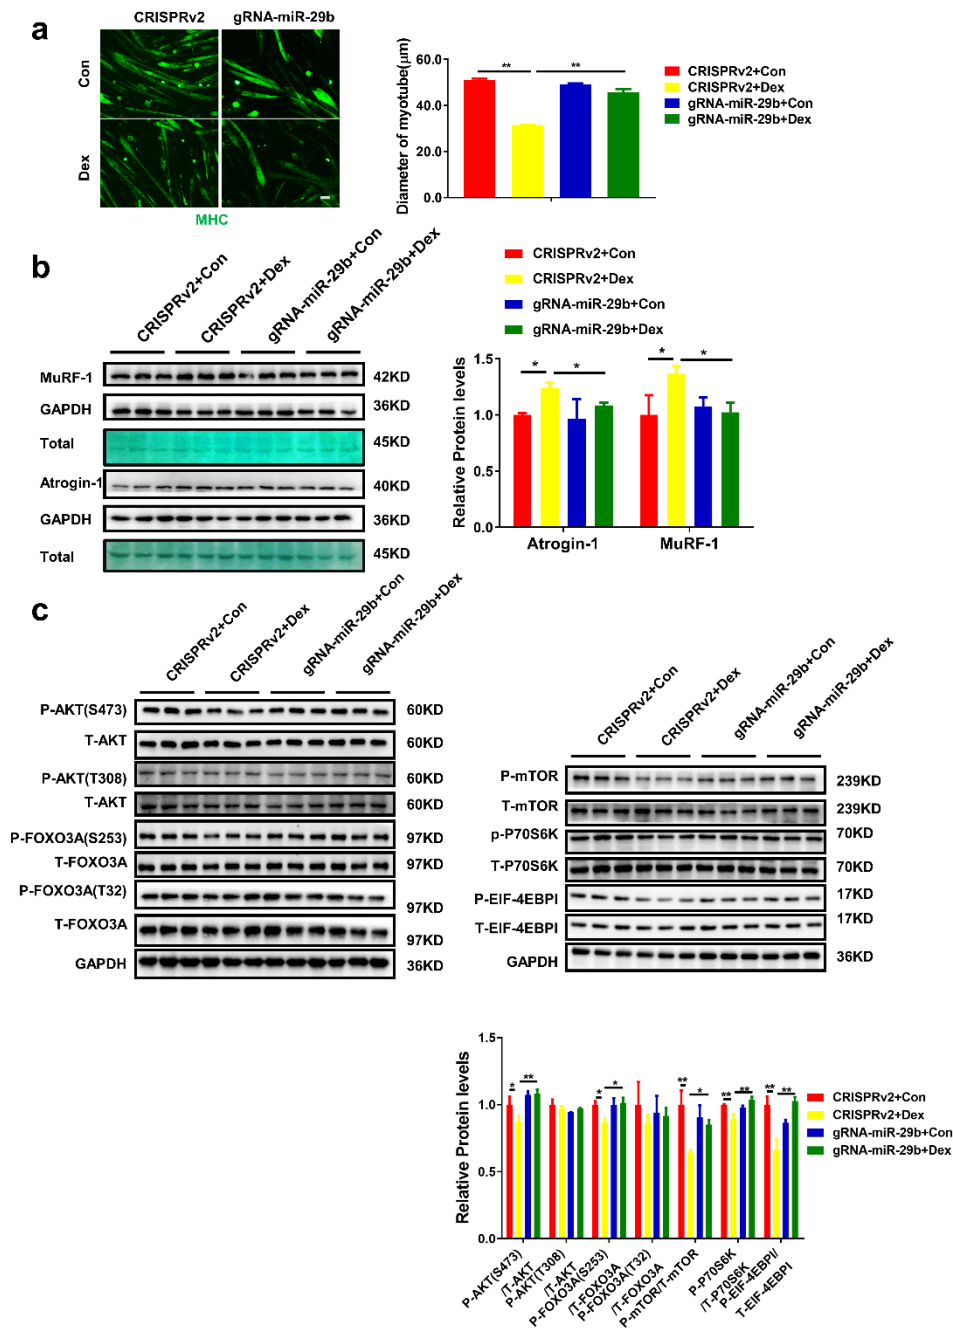

**Figure S2. CRISPR/Cas9 mediated miR-29b editing prevents dexamethasone-induced atrophy in cultured C2C12 myotubes.** (a) Immunofluorescence staining for diameters of C2C12 myotubes in dexamethasone (Dex)-induced atrophy with or without SpCRISPR-gRNA-miR-29b treatment (n=3, scale bar: 100 µm). (b) Western blot and quantitative analysis of MuRF-1 and Atrogin-1 protein levels in dexamethasone-induced atrophy with or without SpCRISPR-gRNA-miR-29b treatment (n=3). GAPDH protein and total proteins are stained for control. (c) Western blot and quantitative analysis for the AKT/FOXO3A/mTOR pathway (AKT, FOXO3A, mTOR, P70S6K, EIF-4EBP1) in C2C12 myotubes (n=3). One-way ANOVA test was performed to compare multiple groups followed by Bonferroni or Dunnett T3's post hoc test based on homogeneity of variance test. \*p<0.05, \*\*p<0.01 versus respective control.

## Figure S3

**a**

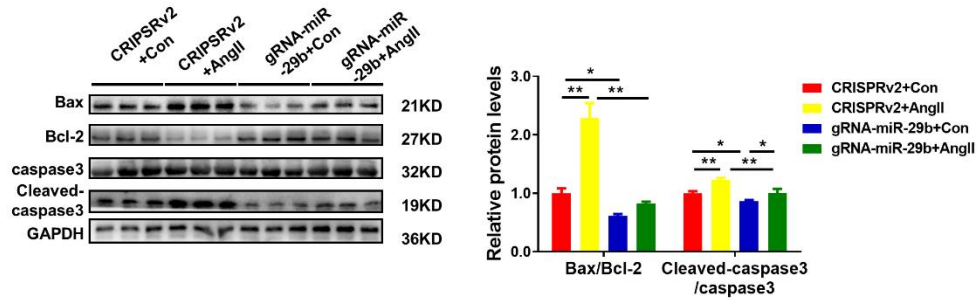

**b**

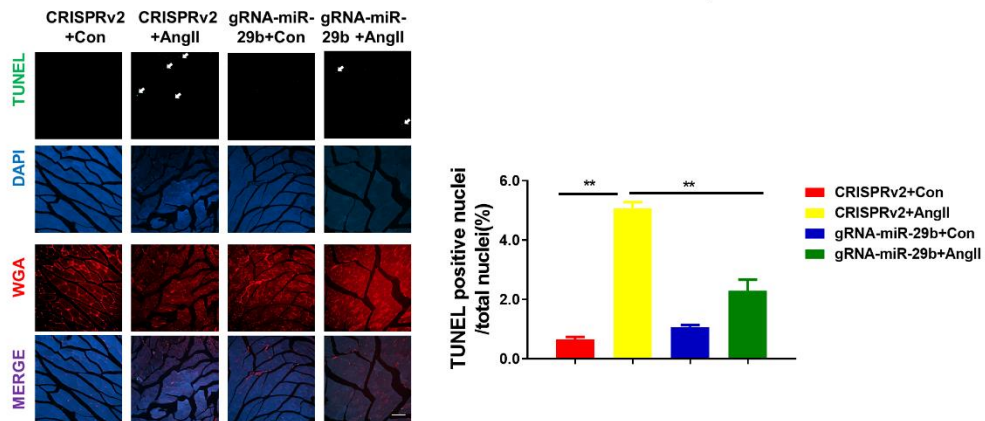

**Figure S3. CRISPR/Cas9 mediated miR-29b editing prevents AngII-induced apoptosis. (a)** Western blot and quantitative analysis of Bcl-2, Bax, Cleaved-caspase 3, caspase 3 protein levels in AngII-treated mice with or without SpCRISPR-gRNA-miR-29b treatment (n=3). **(b)** TUNEL staining of Gastrocnemius muscle in AngII-treated mice with or without SpCRISPR-gRNA-miR-29b treatment (n=4, scale bar: 20 μm). AngII, Angiotensin II. One-way ANOVA test was performed to compare multiple groups followed by Bonferroni or Dunnett T3's post hoc test based on homogeneity of variance test. \*p<0.05, \*\*p<0.01 versus respective control. Data are represented as mean±s.e.m.

**Figure S4**

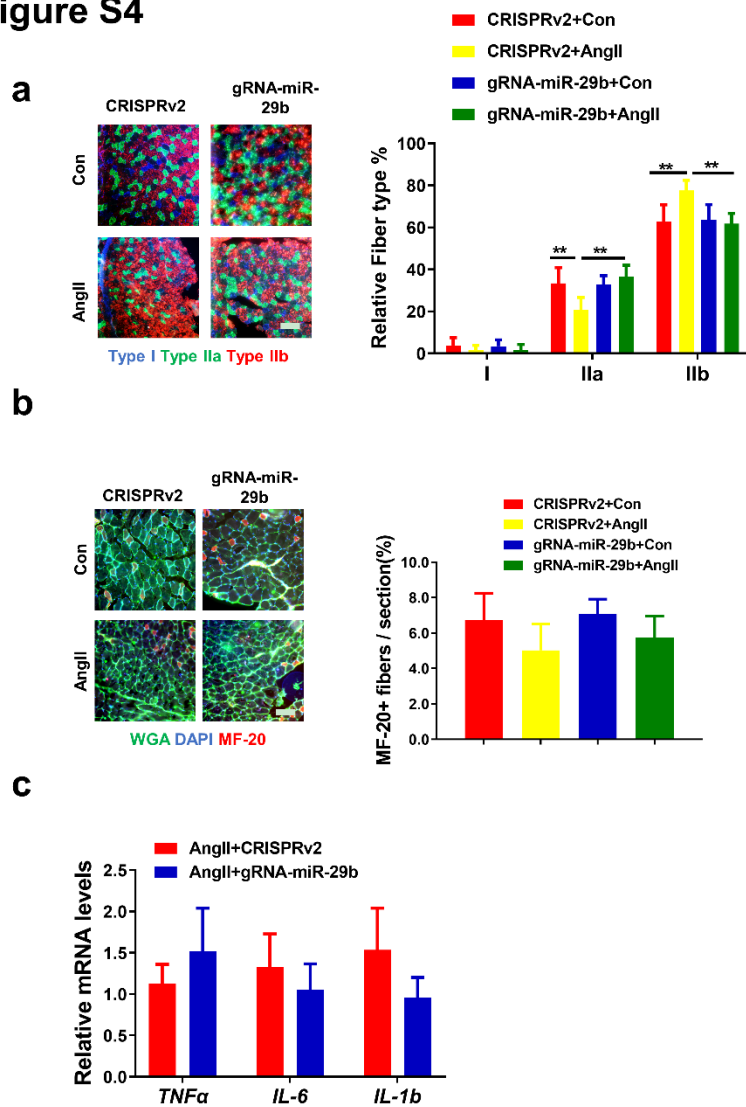

**Figure S4. The effects of CRISPR/Cas9 treatment on muscle fiber composition, regeneration, and inflammation in AngII-induced muscle atrophy. (a)** Immunofluorescence staining of myosin heavy chains isotypes (MHC) in Gastrocnemius muscle from indicated groups (n=6, scale bar: 100  $\mu$ m). **(b)** Immunostaining for MF-20 from Gastrocnemius muscle in AngII-treated mice with or without SpCRISPR-gRNA-miR-29b treatment (n=4, scale bar: 100  $\mu$ m). **(c)** RT-PCR analysis the mRNA expression levels of the inflammation factors (*TNF $\alpha$* , *IL-6*, and *IL-1b*) in AngII-treated mice with or without SpCRISPR-gRNA-miR-29b treatment (n=6). AngII, Angiotensin II. One-way ANOVA test was performed to compare multiple groups followed by Bonferroni or Dunnett T3's post hoc test based on homogeneity of variance test (a-b). An unpaired, two-tailed Student's t-test was used for comparisons between two groups (c). \*\*p<0.01 versus respective control. Data are represented as mean $\pm$ s.e.m.

**Figure S5**

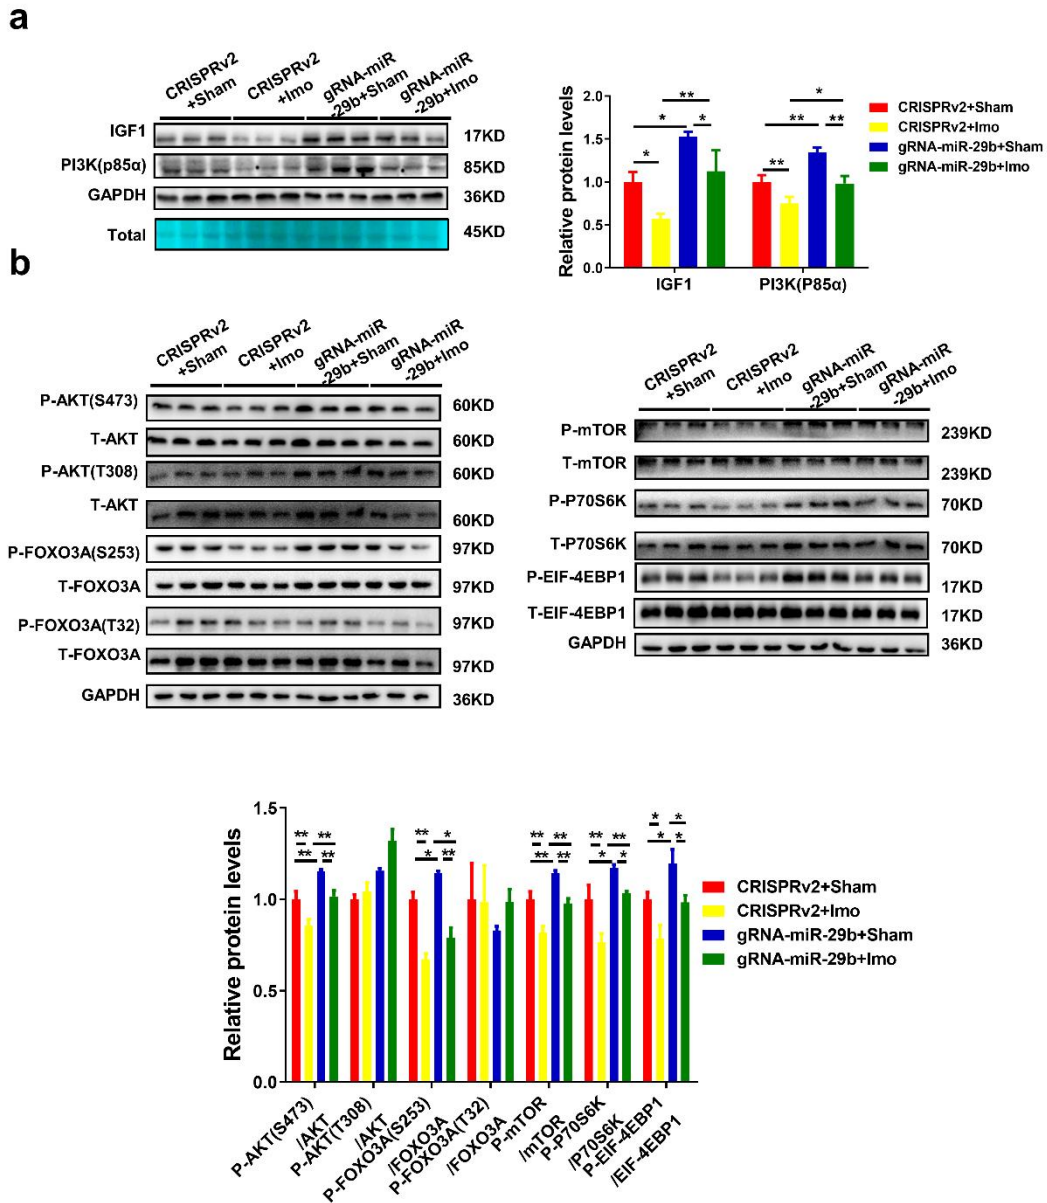

**Figure S5. CRISPR/Cas9 mediated miR-29b editing prevents immobilization-induced atrophy effects through activation of the AKT-FOXO3A-mTOR signaling pathway. (a)** Western blot and quantitative analysis of extracts from Gastrocnemius muscle to detect IGF1 and PI3K(p85 $\alpha$ ) protein in SpCRISPR-gRNA-miR-29b administration mice compared to control (n=3). GAPDH protein and total proteins are stained for control. **(b)** Western blot and quantitative analysis of the AKT/FOXO3A/mTOR pathway (AKT, FOXO3A, mTOR, P70S6K, EIF-4EBP1) in immobilization-treated mice with or without SpCRISPR-gRNA-miR-29b treatment (n=3). Imo, immobilization. One-way ANOVA test was performed to compare multiple groups followed by Bonferroni or Dunnett T3's post hoc test based on homogeneity of variance test. \*p<0.05, \*\*p<0.01 versus respective control. Data are represented as mean $\pm$ s.e.m.

## Figure S6

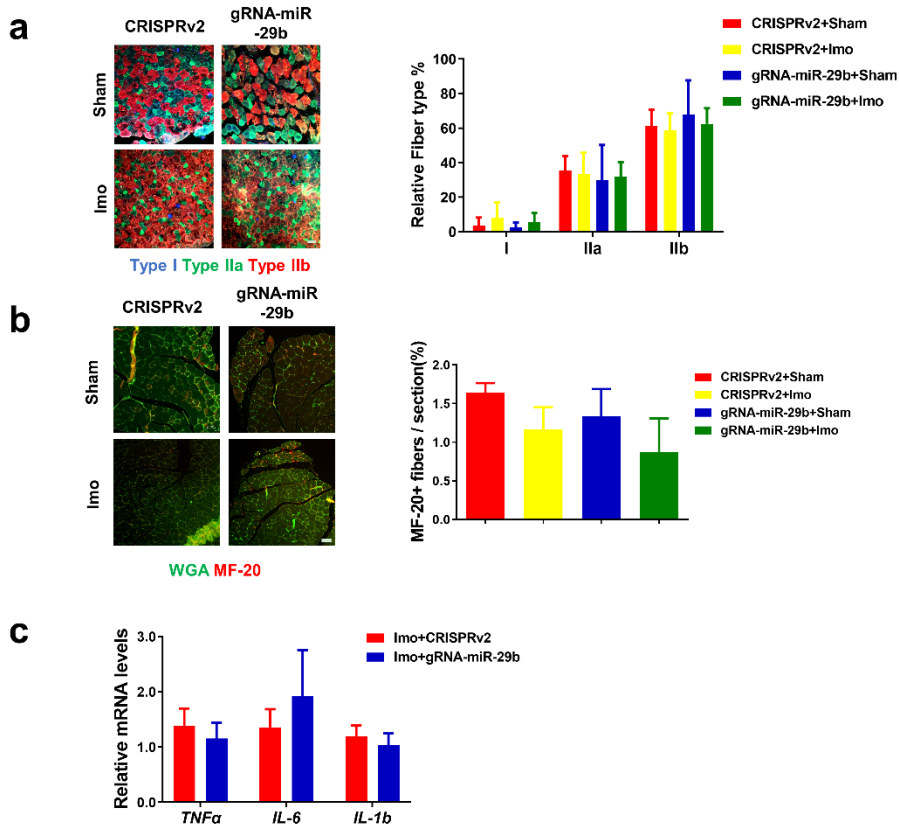

**Figure S6. The effects of CRISPR/Cas9 treatment on muscle fiber composition, regeneration, and inflammation in immobilization-induced muscle atrophy.** (a) The fiber type composition (n=5, scale bar: 100  $\mu$ m), and (b) muscle regeneration (n=3,5,3,5, scale bar: 100  $\mu$ m) in immobilization-induced muscle atrophy were presented by immunofluorescence staining. (c) RT-PCR analysis the mRNA expression levels of the inflammation factors (*TNF $\alpha$* , *IL-6*, and *IL-1b*) in immobilization-treated mice with or without SpCRISPR-gRNA-miR-29b treatment (n=6). Imo, immobilization. One-way ANOVA test was performed to compare multiple groups followed by Bonferroni or Dunnett T3's post hoc test based on homogeneity of variance test (a-b). An unpaired, two-tailed Student's t-test was used for comparisons between two groups (c). Data are represented as mean $\pm$ s.e.m.

**Figure S7**

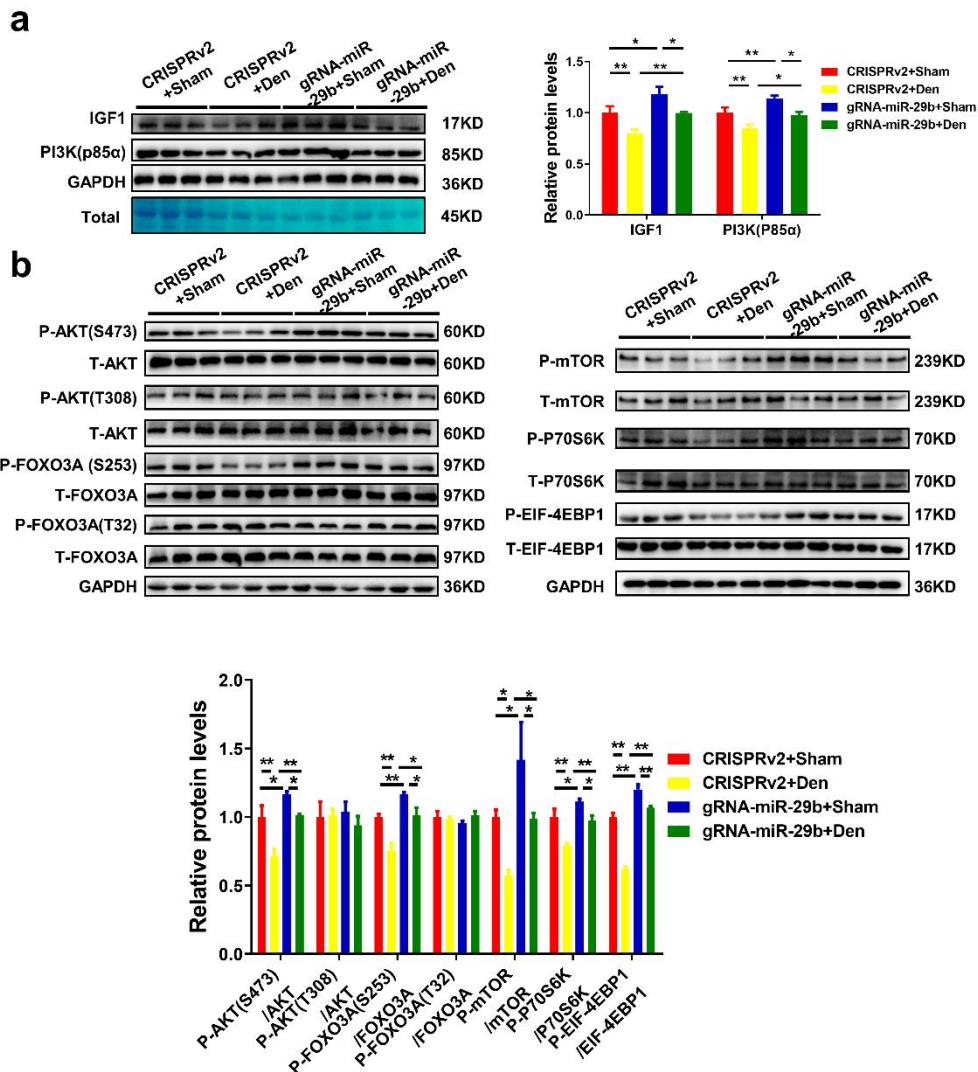

**Figure S7. CRISPR/Cas9 mediated miR-29b editing prevents denervation-induced atrophy effects through activation of the AKT-FOXO3A-mTOR signaling pathway.** (a) Western blot and quantitative analysis of extracts from Gastrocnemius muscle to detect IGF1 and PI3K(p85α) protein is shown in SpCRISPR-gRNA-miR-29b administration mice compared to control (n=3). GAPDH protein and total proteins are stained for control. (b) Western blot and quantitative analysis of the AKT/FOXO3A/mTOR pathway (AKT, FOXO3A, mTOR, P70S6K, EIF-4EBP1) in denervation-treated mice with or without SpCRISPR-gRNA-miR-29b treatment (n=3). Den, denervation. One-way ANOVA test was performed to compare multiple groups followed by Bonferroni or Dunnett T3's post hoc test based on homogeneity of variance test. \*p<0.05, \*\*p<0.01 versus respective control. Data are represented as mean±s.e.m.



## Figure S8

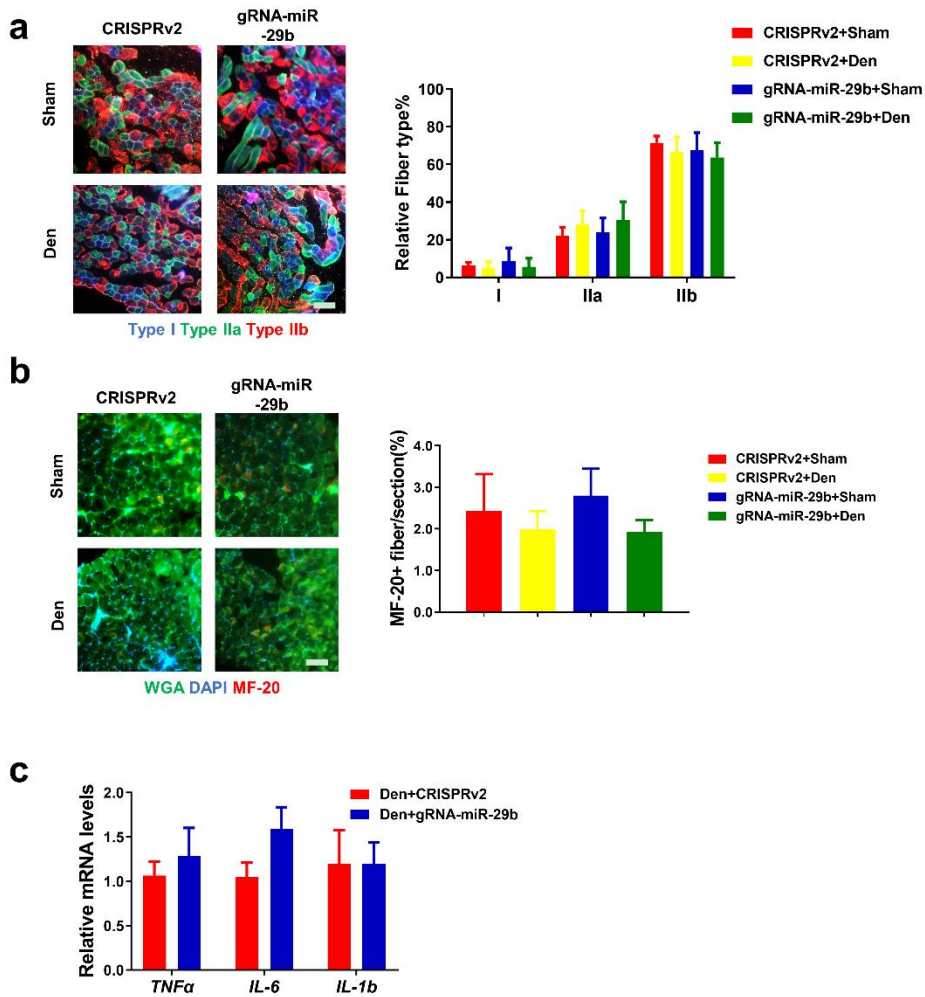

**Figure S8. CRISPR/Cas9 treatment did not affect muscle fiber composition, regeneration, and inflammation in denervation-induced muscle atrophy.** (a) The fiber type composition (n=6, scale bar: 100  $\mu$ m), (b) muscle regeneration (n=4, scale bar: 100  $\mu$ m), and (c) inflammation (n=6) in denervation-induced muscle atrophy were shown as indicated groups. Den, denervation. One-way ANOVA test was performed to compare multiple groups followed by Bonferroni or Dunnett T3's post hoc test based on homogeneity of variance test (a-b). An unpaired, two-tailed Student's t-test was used for comparisons between two groups (c). Data are represented as mean $\pm$ s.e.m.

## Figure S9

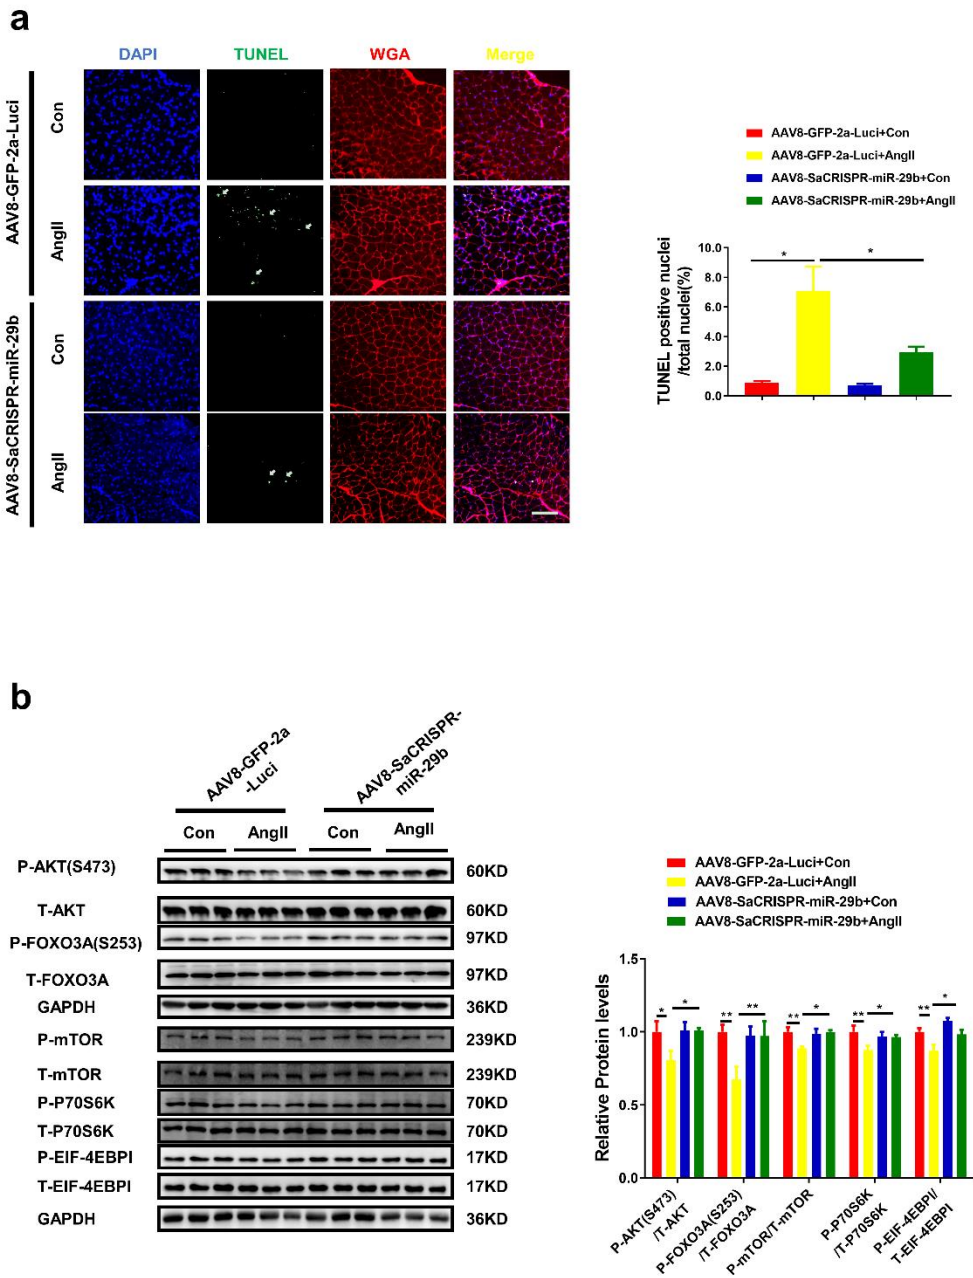

**Figure S9. AAV8-CRISPR/SaCas9 mediated miR-29b editing prevents AngII-induced apoptosis and activates of AKT-FOXO3A-mTOR signaling pathway.** (a) TUNEL staining of Gastrocnemius muscle in AngII-treated mice with or without AAV8-SaCRISPR-miR-29b treatment (n=4, scale bar: 100  $\mu$ m). (b) Western blot and quantitative analysis of the relative phosphorylation levels of AKT(S473), FOXO3A(S253), mTOR, P70S6K and EIF-4EBP1 in AngII-induced muscle atrophy with or without AAV8-SaCRISPR-miR-29b-treated treatment (n=3). AngII, Angiotensin II. One-way ANOVA test was performed to compare multiple groups followed by Bonferroni or Dunnett T3's post hoc test based on homogeneity of variance test. \*p<0.05, \*\*p<0.01 versus respective control. Data are represented as mean $\pm$ s.e.m.

## Figure S10

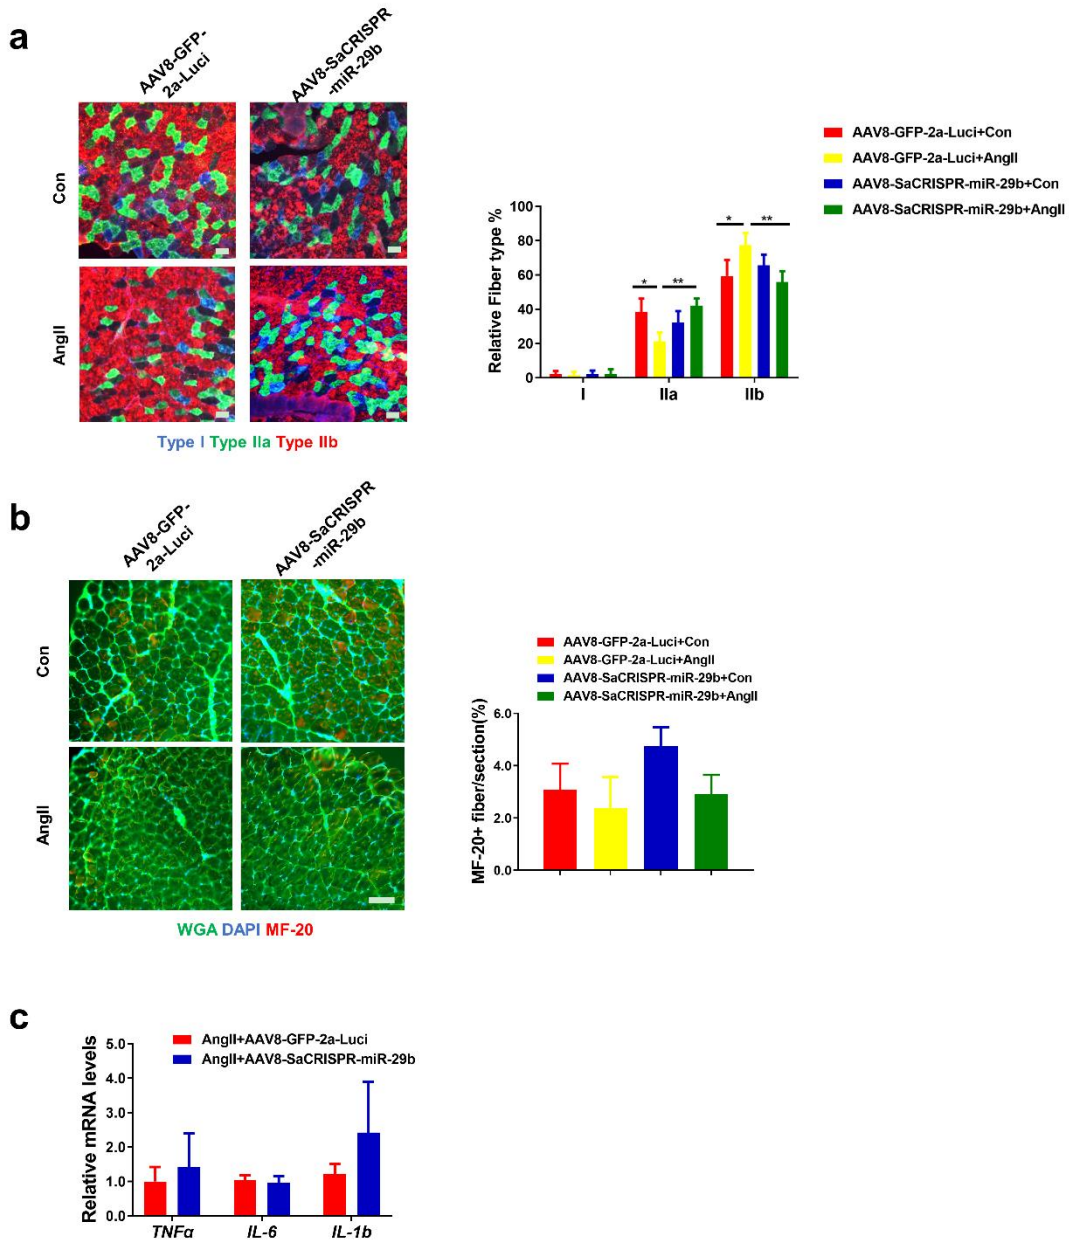

**Figure S10. The effects of AAV8-CRISPR/SaCas9 treatment on muscle fiber composition, regeneration, and inflammation in AngII-induced muscle atrophy.** (a) Immunofluorescence staining of myosin heavy chains isotypes (MHC) in AngII-induced atrophy are presented (n=4, scale bar: 100  $\mu$ m). (b) Immunostaining for MF-20 is shown as indicated groups (n=4, scale bar: 100  $\mu$ m). (c) RT-PCR analysis the expression of inflammation factors (*TNF $\alpha$* , *IL-6*, and *IL-1 $\beta$* ) in AngII-induced muscle atrophy as indicated groups (n=8,7). AngII, Angiotensin II. One-way ANOVA test was performed to compare multiple groups followed by Bonferroni or Dunnett T3's post hoc test based on homogeneity of variance test (a-b). An unpaired, two-tailed Student's t-test was used for comparisons between two groups (c). \*p<0.05, \*\*p<0.01 versus respective control. Data are represented as mean $\pm$ s.e.m.

## Figure S11

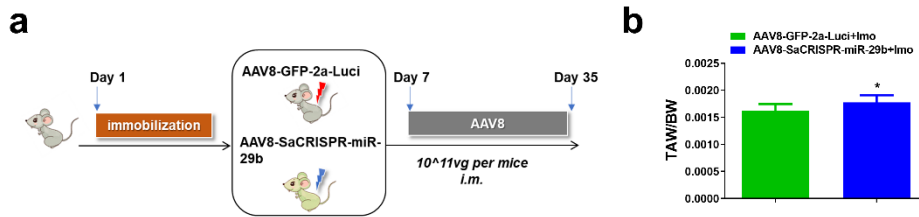

**Figure S11. AAV8-CRISPR/SaCas9 mediated miR-29b editing prevents immobilization induced-muscle atrophy in vivo.** (a) The schedule of immobilization (Imo)-induced atrophy mice model and virus injection establishment. (b) Tibialis anterior weight/body weight ratio (TAW/BW) ratio are shown in Imo-treated mice with or without AAV8-SaCRISPR-miR-29b injection treatment (n=6,7). An unpaired, two-tailed Student's t-test was used for comparisons between two groups (b). \*p<0.05 versus respective control. Data are represented as mean±s.e.m.

## Figure S12

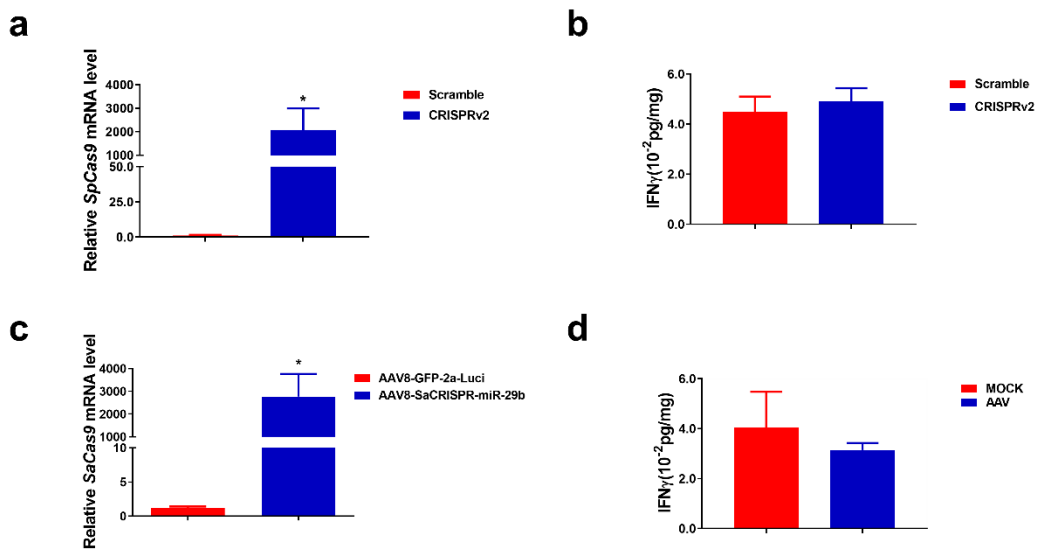

**Figure S12. Expression of both the SpCas9 and SaCas9 mRNA and the production of IFN $\gamma$  in the endpoints of the experiments.** (a) RT-PCR analysis of *SpCas9* mRNA expression level after 2 weeks for lentivirus-delivered CRISPR/spCas9 (n=6). (b) The production of IFN $\gamma$  was evaluated by enzyme-linked immunosorbent assay (ELISA) after 2 weeks for lentivirus-delivered CRISPR/spCas9 (n=5). (c) RT-PCR analysis of *SaCas9* mRNA expression level after 4 weeks for AAV8-delivered /SaCas9 (n=14). (d) The production of IFN $\gamma$  was evaluated by ELISA after 4 weeks for AAV8-delivered /SaCas9 (n=3,6). An unpaired, two-tailed Student's t-test was used for comparisons between two groups. \*p<0.05 versus respective control. Data are represented as mean±s.e.m.

**Supplemental Tables:**

**Table S1. gRNAs sequences used in this study.**

---

|   | <b>Sequence</b>      | <b>PAM</b> |
|---|----------------------|------------|
| A | AGGAAGCTGGTTTCATATGG | TGG        |
| B | TTCAGGAAGCTGGTTTCATA | TGG        |
| C | CCATTTGAAATCAGTGTTTT | AGG        |
| D | CCTAAAACACTGATTCAAA  | TGG        |

---

**Table S2. qPCR primers used in this study.**

| <b>Gene</b>                       | <b>Forward (5'-3')</b>  | <b>Reverse (5'-3')</b> |
|-----------------------------------|-------------------------|------------------------|
| <i>mmu-IL-6</i>                   | TAGTCCTTCCTACCCCAATTTCC | TTGGTCCTTAGCCACTCCTTC  |
| <i>mmu-TNF<math>\alpha</math></i> | AGGCACTCCCCCAAAGATG     | CCACTTGGTGGTTTGTGAGTG  |
| <i>mmu-IL-1b</i>                  | GCAACTGTTCTGAACTCAACT   | ATCTTTTGGGGTCCGTCAACT  |
| <i>SaCas9</i>                     | GGCGTCAGACTGTTCAAGGA    | GGTCGGTCAGCAGGTTGTAA   |
| <i>SpCas9</i>                     | CATCGAGCAGATCAGCGAGT    | CGATCCGTGTCTCGTACAGG   |
| <i>mmu-18s</i>                    | TCAAGAACGAAAGTCGGAGG    | GGACATCTAAGGGCATCAC    |

## **Supplemental Methods:**

### **Cultured C2C12 myotubes staining**

To determine the diameter of myotubes in vitro, C2C12 myotubes were fixed with 4% paraformaldehyde, permeabilized with 0.5% Triton X-100, and blocked with 5% BSA. Then the primary antibody anti-MHC (MF-20, 1:100, DSHB) was used to specific label myotubes, FITC-AffiniPure Rabbit Anti-Mouse IgG (H+L) (1:500, Jackson) was used as secondary antibody. DAPI was subjected to nuclear staining. Images were captured by fluorescence microscope (Leica, Wetzlar, Germany) and the diameter of myotubes was measured by Image J.

### **Skeletal Muscle Histology and Immunofluorescence**

For skeletal muscle fiber types analyses, skeletal muscle was obtained and embedded in OCT, and snap frozen in cold liquid nitrogen. Samples were cut at 10  $\mu\text{m}$  per section. The section was incubated in room temperature (RT) for 20min, fixed with 4% paraformaldehyde in RT for another 20min. Then, sections were blocked with 5% BSA in PBS, incubated with anti-MyHC-I (BA-D5, 1:3, DSHB), anti-MyHC-IIA (SC-71, 1:10, DSHB), anti-MyHC-IIb (BF-F3, 1:3, DSHB) overnight at 4°C. After washed with PBS, the secondary antibodies were applied at a dilution of 1:100, the Alexa 350 anti-mouse IgG2b (Invitrogen, USA), Alexa 488 anti-mouse IgG1 (Invitrogen, USA), and Alexa 555 anti-mouse IgM (Invitrogen, USA) were used. Then the images were captured by fluorescence microscope (Zeiss, Oberkochen Germany).

For regeneration analysis, frozen sections of 10 $\mu\text{m}$  were used after rewarming, permeability and blocking, the sections were incubated with MF-20 (1:50, DSHB) overnight at 4°C. Then WGA conjugates (Invitrogen, USA) was incubated to show the outline of muscle fibers. Secondary antibody Cy3-AffiniPure Rabbit Anti-Mouse IgG (H+L) (1:500, Jackson, USA) was incubated at RT for 1 h to label MF-20, and 4,6-Diamidin-2-phenylindol (DAPI, Sigma, USA) was stained for nuclei. The images were captured using fluorescence microscope (Zeiss, Oberkochen Germany).
